# Supplementary material for: Facile template-free synthesis of uniform carbon-confined V2O3 hollow spheres for stable and fast lithium storage
Source: Royal Society of Chemistry journal article supplement (doi:10.1039/c8ta01695j), 2018-01-01
Supplement: c8ta01695j1.pdf [file c8ta01695j1.pdf]

## Facile template-free synthesis of uniform carbon-confined V<sub>2</sub>O<sub>3</sub> hollow microspheres for stable and fast lithium storage

Chunhua Han\*, Fang Liu, Jinshuai Liu, Qi Li, Jiashen Meng, Bowen Shao, Qiu He, Xuanpeng Wang, Ziang Liu, Liqiang Mai\*

State Key Laboratory of Advanced Technology for Materials Synthesis and Processing, Wuhan University of Technology, Wuhan 430070, China

\*Email - mlq518@whut.edu.cn, mlq518@163.com

### Experimental

#### Synthesis of uniform V<sub>2</sub>O<sub>3</sub>@NC hollow microspheres

All the reagents are of analytical grade and used as-received without further purification. First, 0.5 g of vanadium acetylacetonate and 1 g of 2-dimethylimidazole were successively dissolved in 40 mL of N, N-dimethylformamide (DMF) solvent under stirring. The resulting mixture was stirred for another 1 h at room temperature. The obtained solution was transferred to a 50 mL Teflon autoclave and then heated to 160 °C for 12 h. Then, the V-2-MIM complex precursor hollow microspheres were collected, washed with ethyl alcohol three times and dried under vacuum at 60 °C for 12 h. Subsequently, after sintered at 500 °C for 3 h in argon, uniform V<sub>2</sub>O<sub>3</sub>@NC hollow microspheres were obtained.

#### Characterizations

The crystallographic characteristics of the final products were measured using a Bruker D8 Discover X-ray diffractometer equipped with a Cu K $\alpha$  radiation source. Scanning electron microscopy (SEM) images were collected by a JEOL JSM-7100F at an acceleration voltage of 15 kV. TEM images were collected using a JEM-2100F transmission electron microscope. Energy-dispersive X-ray spectra were recorded using an Oxford IE250 system. Raman and FTIR spectra were obtained using a Renishaw INVIA micro-Raman spectroscopy system. X-ray photoelectron spectroscopy (XPS) measurements were conducted using a VG MultiLab 2000 instrument. The Brunauer-Emmett-Teller (BET) surface areas and pore size distribution were measured using Tristar II 3020 instrument by nitrogen adsorption at 77 K. TG-DSC analysis was conducted using an STA-449F3 instrument. ICP-AES analysis was conducted using a Prodigy 7 instrument.

#### Electrochemical measurements

The working electrode slurry was composed of 70 wt%  $V_2O_3@NC$  hollow microspheres, 20 wt% acetylene black, 10 wt% polyvinylidene fluorides (PVDF) and N-methyl-2-pyrrolidinone (NMP). After coating onto copper foil, the electrode film was uniformly cut into  $\sim 0.5 \text{ cm}^2$  (area) round slices, weighing a total of  $\sim 1.0 \text{ mg}$ ; the corresponding areal mass loading was  $2 \text{ mg cm}^{-2}$ . Cell assembly was carried out in an argon-filled glove box with the concentrations of moisture and oxygen below 0.1 ppm. Lithium foil was used as the counter electrode and the separator was Celgard 2400 microporous membrane. 1 M lithium hexafluorophosphate ( $LiPF_6$ ) solution in ethylene carbon (EC)-dimethyl carbonate (DMC) (1:1 v/v) was used as the electrolyte. Galvanostatic charge/discharge measurements were performed using a multichannel battery testing system (LAND CT2001A). Cyclic voltammetry (CV) and electrochemical impedance spectroscopy (EIS) were performed with a CHI 600e electrochemical workstation and Auto lab PGSTAT 302N.

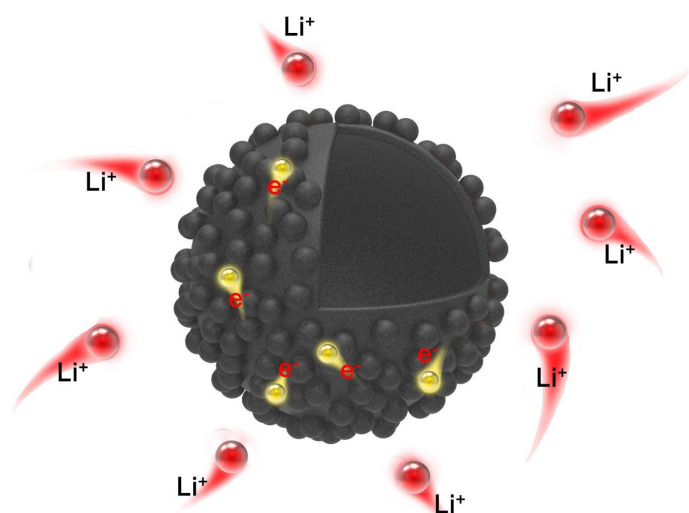

**Fig. S1** Schematic illustration of single  $V_2O_3@NC$  hollow microsphere with efficient electron and  $Li^+$  transport.

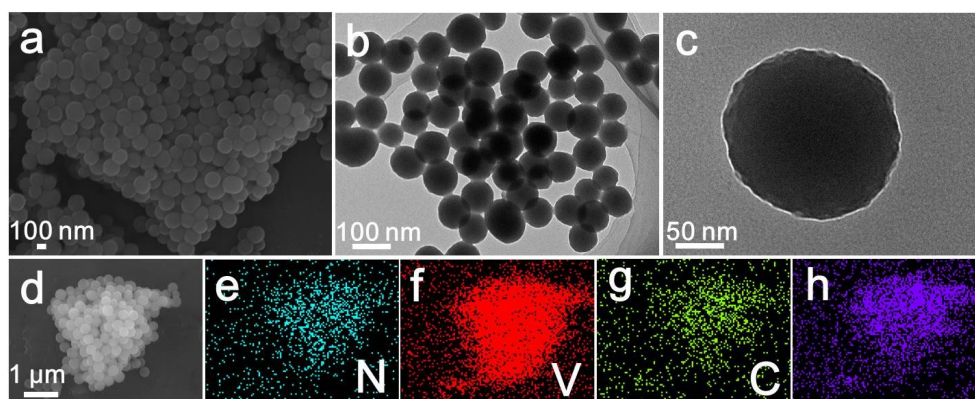

**Fig. S2** Characterizations of the V-2-MIM complex solid microspheres. (a) SEM image. (b, c) TEM images. (d-h) SEM image and the corresponding EDS mapping images.

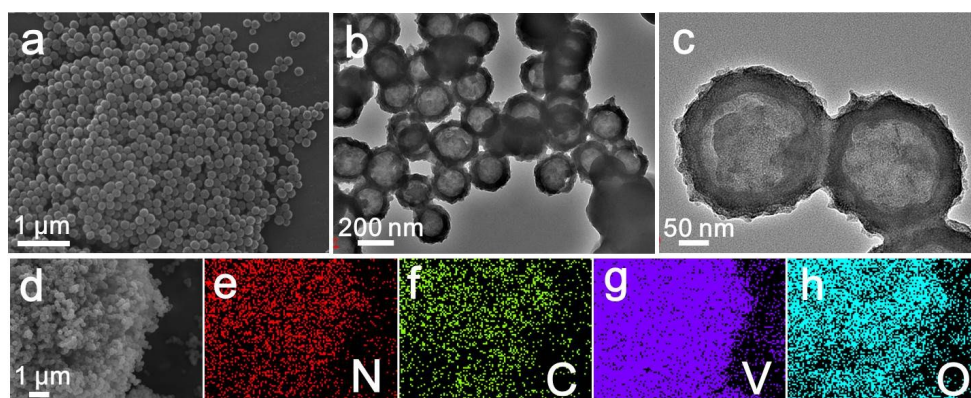

**Fig. S3** Characterizations of the V-2-MIM complex yolk-shell microspheres. (a) SEM image. (b, c) TEM images. (d-h) SEM image and the corresponding EDS mapping images.

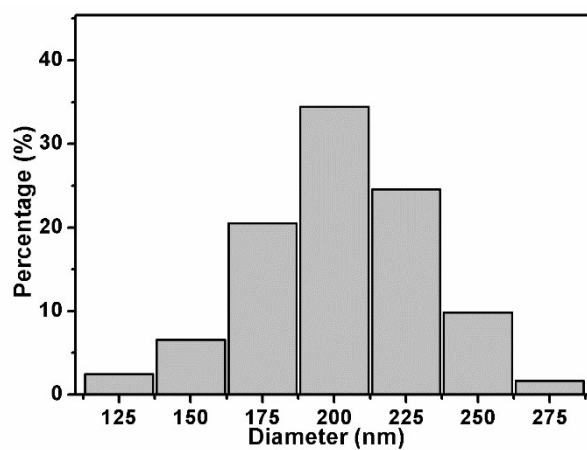

**Fig. S4** Diameter distribution of amorphous V-2-MIM complex hollow spheres.

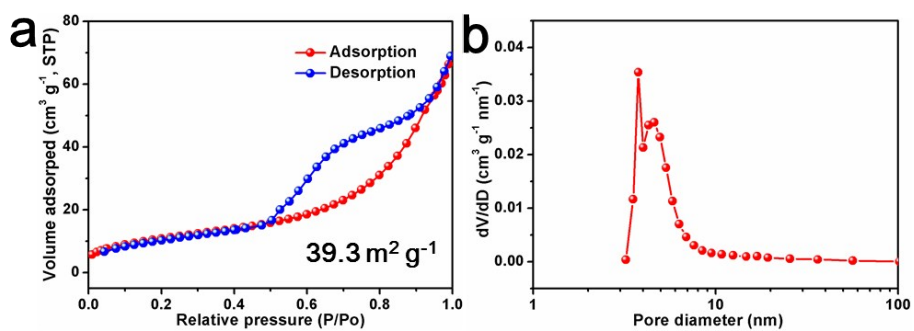

**Fig. S5** (a, b) BET and BJH curves of the V-2-MIM complex hollow microspheres.

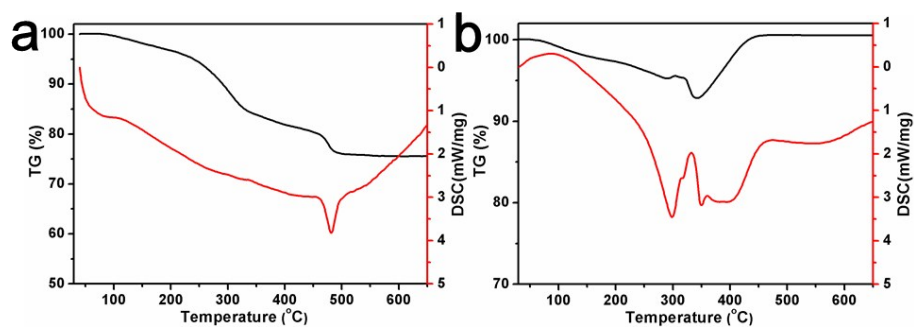

**Fig. S6** (a, b) TG and DSC curves of the V-2-MIM complex hollow microspheres tested in argon and air conditions, respectively.

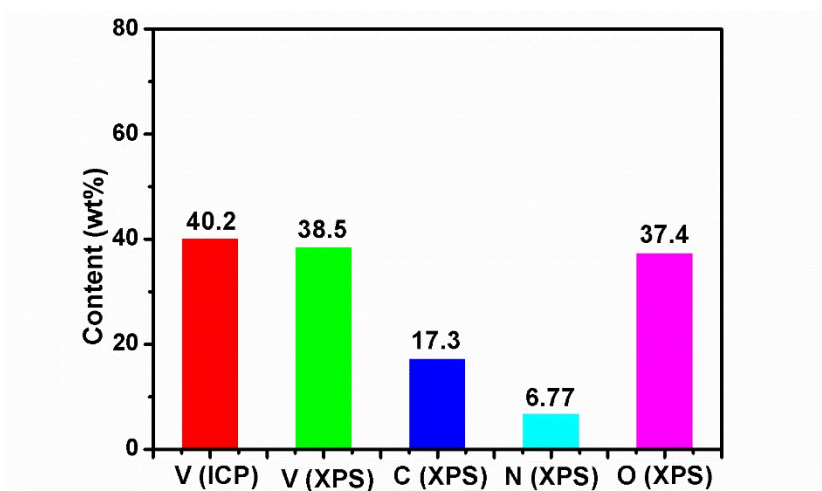

**Fig. S7** Elemental content of amorphous V-2-MIM complex hollow spheres, obtained from XPS and ICP-AES measurements.

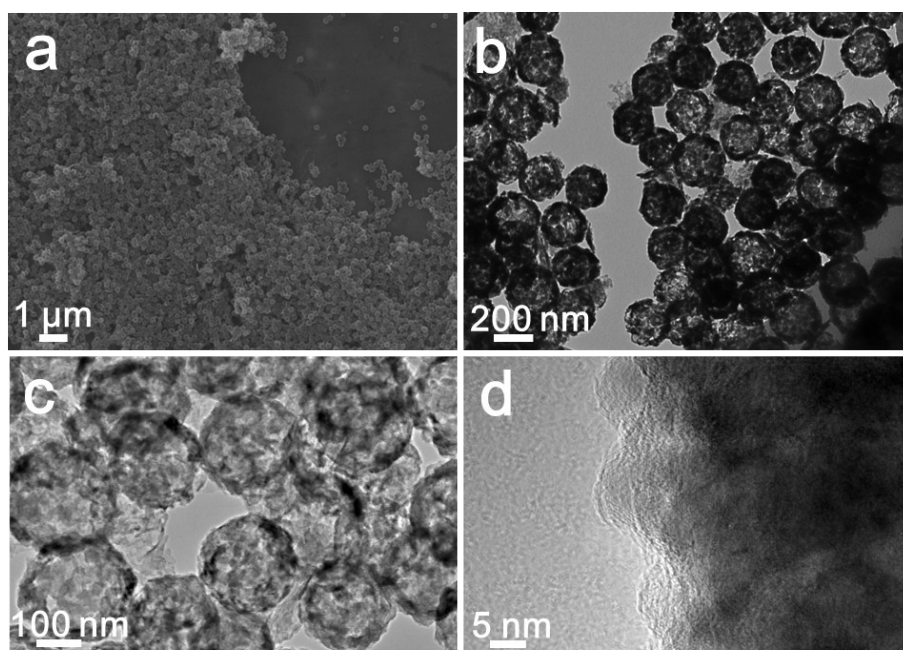

**Fig. S8** Morphology characterizations of uniform  $V_2O_3@NC$  hollow microspheres. (a) SEM image. (b, c) TEM images. (d) HRTEM image.

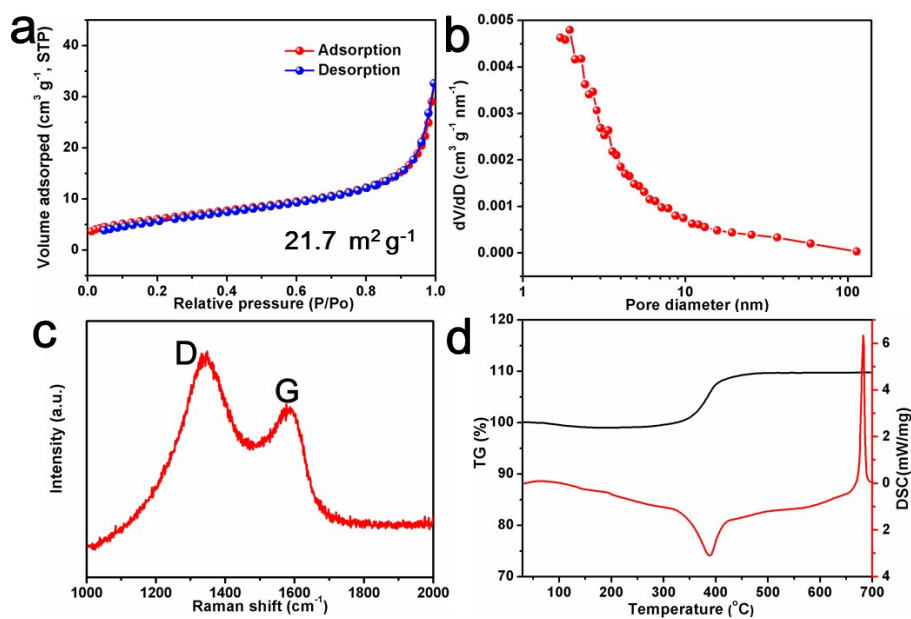

**Fig. S9** Structure characterizations of uniform  $V_2O_3@NC$  hollow microspheres. (a) BET curve. (b) BJH curve. (c) Raman spectrum. (d) TG and DSC curves.

The reaction equations of  $V_2O_3@NC$  hollow spheres during the heat treatment at are as follows:

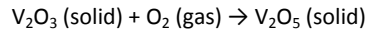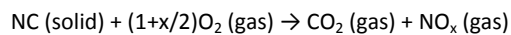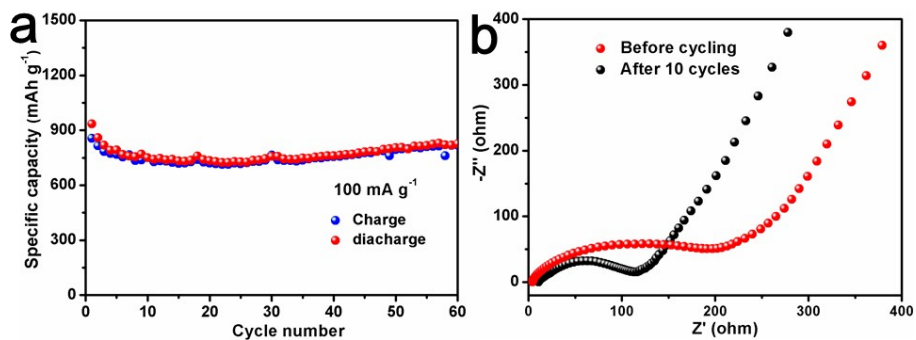

**Fig. S10** (a) Cycling performance of  $V_2O_3@NC$  hollow microspheres at a current density of  $100 mA g^{-1}$ . (b) The Nyquist plots of  $V_2O_3@NC$  hollow microspheres at different cycles.

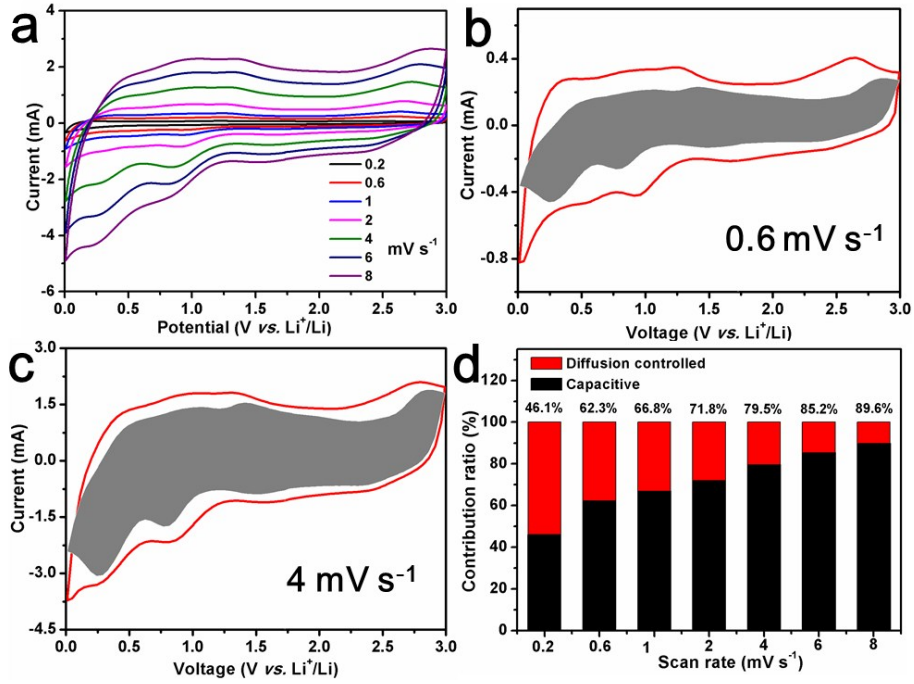

**Fig. S11** Lithium storage kinetic analyses of uniform  $V_2O_3@NC$  hollow microspheres. (a) CV curves at different scan rates. (b, c) Separation of the capacitive and diffusion currents at scan rates of 0.6 and 4  $mV s^{-1}$ , respectively. (d) Contribution ratio of the capacitive and diffusion-controlled charge versus scan rate.

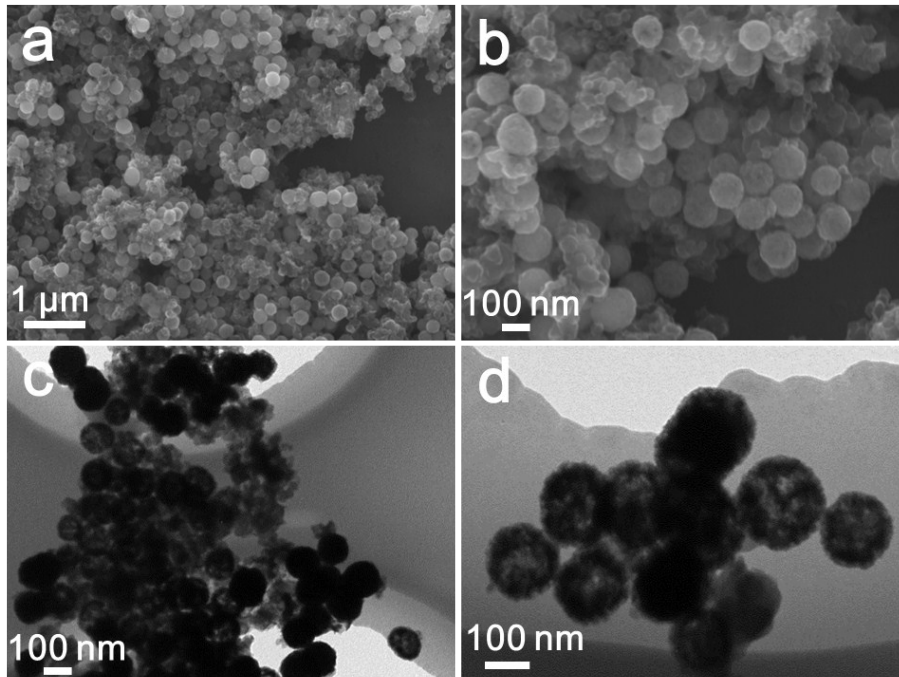

**Fig. S12** SEM images (a, b) and TEM images (c, d) of uniform  $V_2O_3@NC$  hollow microspheres after 50 cycles at 200  $mA g^{-1}$ .

**Table S1.** A comparison of our work and previous reports on different carbon-based V<sub>2</sub>O<sub>3</sub> nanostructures for LIBs.

| Morphology                                                           | Voltage range (V) | Current density (mA g <sup>-1</sup> ) | Cycle number | Residual capacity (mAh g <sup>-1</sup> ) | Capacity retention | Reference |
|----------------------------------------------------------------------|-------------------|---------------------------------------|--------------|------------------------------------------|--------------------|-----------|
| V <sub>2</sub> O <sub>3</sub> @NC hollow microspheres                | 0.01-3            | 200<br>2000                           | 120<br>700   | 811<br>472                               | 108%<br>123%       | Our work  |
| Coherent porous V <sub>2</sub> O <sub>3</sub> /carbon nanocomposites | 0.01-3            | 100                                   | 200          | 587                                      | 65.9%              | Ref. 30   |
| V <sub>2</sub> O <sub>3</sub> /carbon nano-felts                     | 0.01-3            | 200                                   | 100          | 420                                      | 101%               | Ref. 31   |
| Carbon-coated yolk-shell V <sub>2</sub> O <sub>3</sub> microspheres  | 0.01-3            | 100                                   | 100          | 437.5                                    | 92.5%              | Ref. 32   |
| Carbon-supported V <sub>2</sub> O <sub>3</sub> microspheres          | 0.01-3            | 200<br>2000                           | 600<br>7000  | 505<br>250                               | 194%<br>100%       | Ref. 33   |
| V <sub>2</sub> O <sub>3</sub> -ordered mesoporous carbon composites  | 0.02-3            | 100                                   | 180          | 536                                      | 78.2%              | Ref. 35   |
| Reduced graphene oxide modified V <sub>2</sub> O <sub>3</sub>        | 0.01-3            | 100<br>500                            | 50<br>250    | 380<br>270                               | 81.8%<br>84.3%     | Ref. 36   |
